# Supplementary material for: Enhanced compatibility between a copper nanowire-based transparent electrode and a hybrid perovskite absorber by poly(ethylenimine)
Source: Royal Society of Chemistry journal article supplement (doi:10.1039/c7nr04739h), 2017-01-01
Supplement: c7nr04739h1.pdf [file c7nr04739h1.pdf]

## Electronic Supplementary Information

### Enhanced compatibility between copper nanowire-based transparent electrode and hybrid perovskite absorber by poly(ethylenimine)

Hyewon Hwang,‡ Jihoon Ahn,‡ Eunsong Lee, Kyungmi Kim, Hyeok-Chan Kwon, and Jooho Moon\*

*Department of Materials Science and Engineering, Yonsei University, Seoul 120-749, Republic of Korea*

*\*E-mail: jmoon@yonsei.ac.kr*

#### Experimental section

##### Preparation of copper nanowire (CuNW) suspension

In order to prepare CuNW suspension, 0.013 M anhydrous copper chloride ( $\text{CuCl}_2$ ; 97%, Sigma-Aldrich, St. Louis, MO, USA), 0.011 M anhydrous dextrose ( $\text{C}_6\text{H}_{12}\text{O}_6$ ; Sigma-Aldrich), and 0.056 M 1-hexadecylamine ( $\text{C}_{16}\text{H}_{35}\text{N}$ ; 98%, Sigma-Aldrich) were dissolved in 600 mL of deionized water. By stirring the solution at 600 rpm for 12 h, a sky-blue solution containing Cu-akylamine complex was obtained.<sup>S1</sup> The solution was then heated in a hydrothermal reactor at 120 °C for 15 h, which yielded a reddish-brown aqueous CuNW suspension. The solution was centrifuged for 4 min at 12000 rpm and then washed several times with deionized water and a 1:2 (v/v) mixture of IPA (Duksan Pure Chemicals, Ansan-si, Gyeonggi-do, Korea) and hexane (Duksan Pure Chemicals) to remove unreacted residues.

##### Preparation of AZO/CuNWs/AZO composite electrode

The AZO/CuNWs/AZO composite transparent electrodes were prepared by the layer-by-layer deposition technique. First, the bottom AZO layer with a thickness of ca. 30 nm was deposited by magnetron sputtering using an AZO target at a constant dc power of 70 W, Ar flow of 24 sccm, and working pressure of 2 mTorr on a glass substrate with dimensions of 20 × 20 mm<sup>2</sup>. The CuNW network was then deposited on the bottom AZO layer by vacuum filtration with lactic acid treatment.<sup>S2</sup> The AZO/CuNW films were annealed at 200 °C for 30 min in N<sub>2</sub> atmosphere. The top AZO layer was deposited on the CuNW film using two-step deposition sequences. A 20 nm-thick AZO layer was then deposited under the same conditions as that of the bottom AZO layer. After the temperature of the sputtering chamber was elevated to 200 °C, an additional AZO layer with a thickness of ca. 20 nm was deposited at a dc power of 80 W, Ar flow of 17 sccm, O<sub>2</sub> flow of 8 sccm, and working pressure of 2.7 mTorr. Typically, the composite electrodes

possessed a transmittance of 87–88% at 550 nm and sheet resistance of 38–40  $\Omega/\square$ .

### **Fabrication of perovskite solar cells**

On the transparent electrodes (TEC-15, Pilkington, UK; or AZO/CuNWs/AZO), a ca. 140-nm-thick ZnO layer was coated as an ETL by magnetron sputtering at a dc power of 60 W, Ar flow of 50 sccm, O<sub>2</sub> flow of 5 sccm, and working pressure of 1 mTorr. After the deposited ZnO electrodes were cleaned by a O<sub>2</sub> plasma cleaner (PDC-002, Harrick Plasma, New York, USA), a poly(ethylenimine) (PEI, branched, Mw ~25,000 by LS and Mn ~10,000 by GPC, Sigma-Aldrich) layer was spin-coated at 5000 rpm using 0.1 wt% PEI solution dissolved in 2-propanol. The PEI coated substrate was annealed at 105 °C for 10 min. The perovskite absorber layer was fabricated with a 53 wt% solution in dimethylformamide (DMF, Sigma-Aldrich). Lead iodide (PbI<sub>2</sub>, Alfa-aesar, MA, USA), methylammonium iodide (CH<sub>3</sub>NH<sub>3</sub>I, Dyesol, Australia), and dimethylsulfoxide (DMSO, Sigma-Aldrich) were dissolved in the solution in the mole ratio of 1:1:1. This solution was spin-coated at 4000 rpm for 25 s, followed by drying at 65 °C for 3 min and annealing at 105 °C for 10 min. Further, the hole-transporting layer was prepared as follows: the precursor solution for the HTM was prepared using 54 mM 2,2',7,7'-tetrakis(*N,N*-di-*p*-methoxyphenylamine)-9,9-spirobifluorene (Spiro-OMeTAD, Boron Molecular, Raleigh, NC, USA) in chlorobenzene, with 177.7 mM 4-*tert*-butylpyridine and 28.5 mM lithium bis-(trifluoromethylsulfonyl)imide in acetonitrile as additives. The solution was spin-coated at 1150 rpm for 30 s. Finally, Au electrode with 70 nm thickness was deposited on the top of the cell by evaporation.

### **Preparation of MAPbI<sub>3</sub> powder**

In 1 ml of ethanol (Duksan Pure Chemicals), 922 mg of PbI<sub>2</sub> and 318 mg of CH<sub>3</sub>NH<sub>3</sub>I were poured together. Under vigorous stirring, dark solid products were formed in the solution. Solvent was evaporated with vacuum to obtain MAPbI<sub>3</sub> powder.

### **Reaction between MAPbI<sub>3</sub> powder and PEI**

50 mg of PEI was put in a vial and 1 ml of anhydrous toluene (Duksan Pure Chemicals) was poured in the vial. 100 mg of MAPbI<sub>3</sub> powder was added to the mixture. The mixture was allowed to reaction for 3 h under vigorous magnetic stirring. Viscous product was obtained after the evaporation of toluene by vacuum. .

### **Measurement of chemical stability of the electrodes against perovskite**

In order to examine the chemical stability of various AZO/CuNWs/AZO electrodes with and without ZnO and PEI layers against MAPbI<sub>3</sub>, a MAPbI<sub>3</sub> layer was sequentially deposited and removed from the CuNW-based electrode substrate. The deposition procedure for the ZnO and MAPbI<sub>3</sub> layers is the same as described above. After the MAPbI<sub>3</sub> layer was deposited, it was aged for 120 h in ambient condition. Then, the MAPbI<sub>3</sub>-coated substrate was immersed in  $\gamma$ -butyrolactone (GBL, Sigma-Aldrich) and ethanol (Duksan pure chemicals) for 3 min each, and the top layer was carefully wiped out with a cotton swab.

Finally, the MAPbI<sub>3</sub> layer was dissolved out, exposing the surface of the electrodes. The XRD profiles and sheet resistance of the electrodes were then recorded.

### Characterization

SEM images were obtained using a field emission scanning electron microscope (FE-SEM, JSM-7001F, JEOL Ltd., Japan). The total transmittance was determined using a UV–visible spectrophotometer (V-670, Jasco, Japan) equipped with an integrating sphere (ARMN-735, Jasco, Japan). The sheet resistance was measured using a four-point probe meter (RS8, BEGA Technologies, Seoul, Korea), and XRD profiles were obtained using an X-ray diffractometer (D/MAX-2500, Rigaku, Tokyo, Japan). The photovoltaic properties were measured using a solar simulator (Sol3A Class AAA, Oriel Instrument, Irvine, USA) at 100 mW cm<sup>-2</sup> (1 sun) with a xenon arc lamp equipped with a 1.5G air mass sunlight filter. The selected area (0.06 cm<sup>2</sup>) covered by a hard mask was exposed to the light and scanned at a rate of 480 mV s<sup>-1</sup> and a delay time of 50 ms. The external quantum efficiency (EQE) was measured by a QEX 10 IPCE measurement system (PV measurements, Inc., Colorado, USA) in the wavelength range of 300–900 nm.

### ESI References

S1 D. V. Ravi Kumar, I. Kim, Z. Zhong, K. Kim, D. Lee and J. Moon, *Phys. Chem. Chem. Phys.*, 2014, **16**, 22107.

S2 Y. Won, A. Kim, W. Yang, S. Jeong and J. Moon, *NPG Asia Mater.*, 2014, **6**.

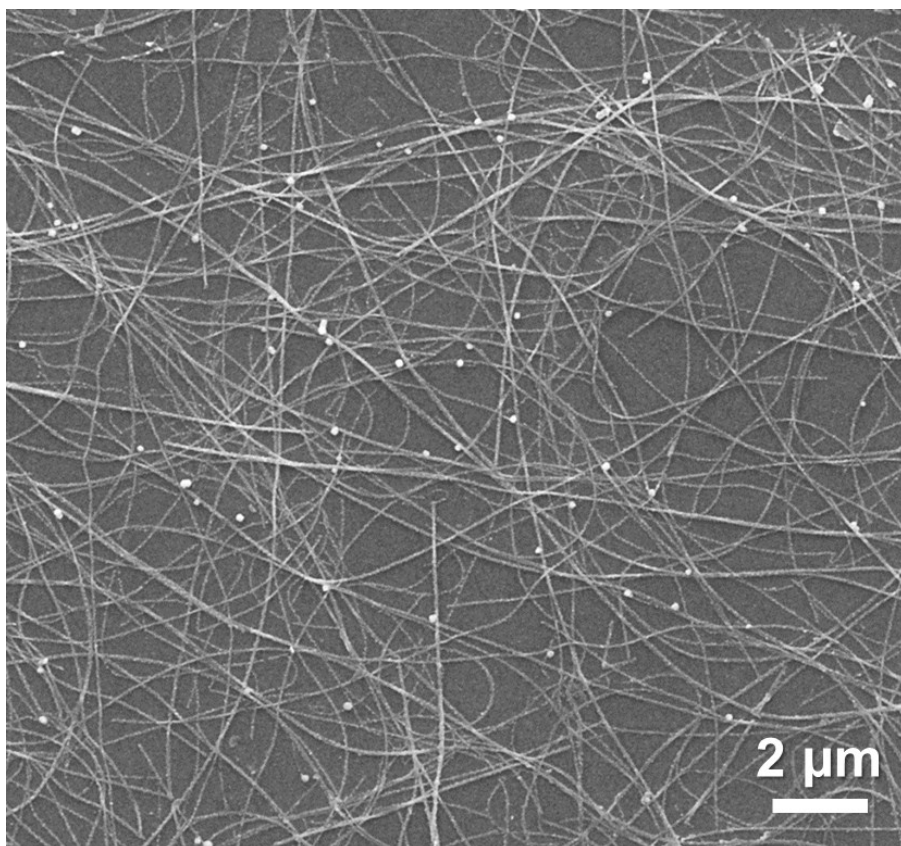

Fig. S1 SEM image of CuNW network film; CuNWs are few micrometers long with ca. 50 nm diameter.

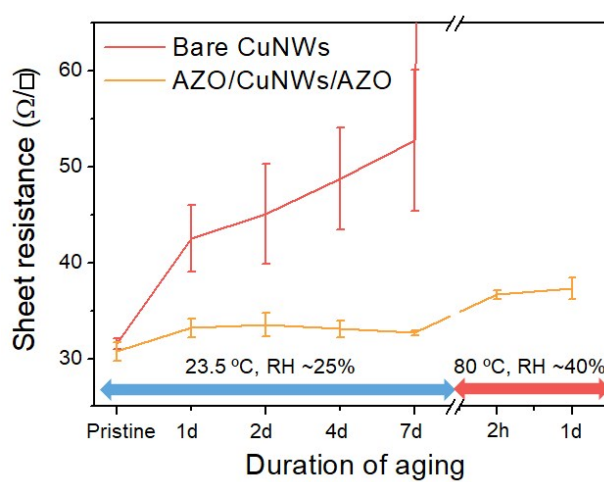

**Fig. S2** Sheet resistance change of bare CuNWs network electrode and AZO/CuNWs/AZO composite electrode while stored in specific conditions (23.5 °C and relative humidity (RH) of ~25%; 80 °C and RH = 40 %).

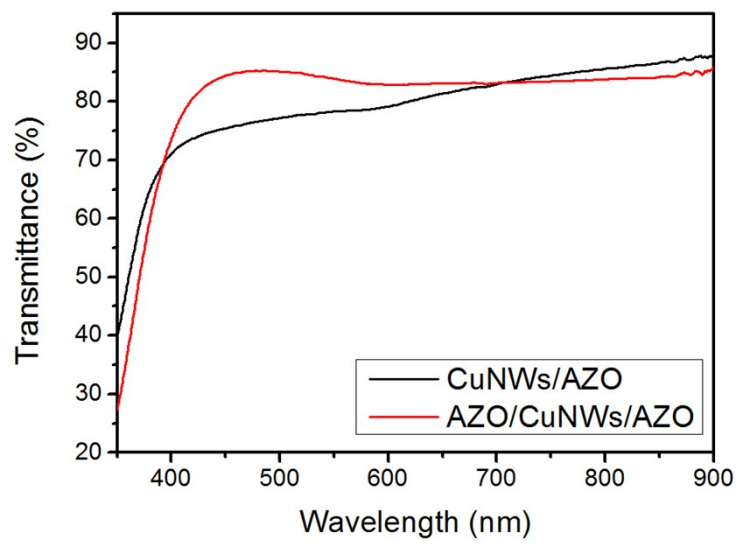

**Fig. S3** Transmittance spectra of CuNWs/AZO and AZO/CuNWs/AZO.

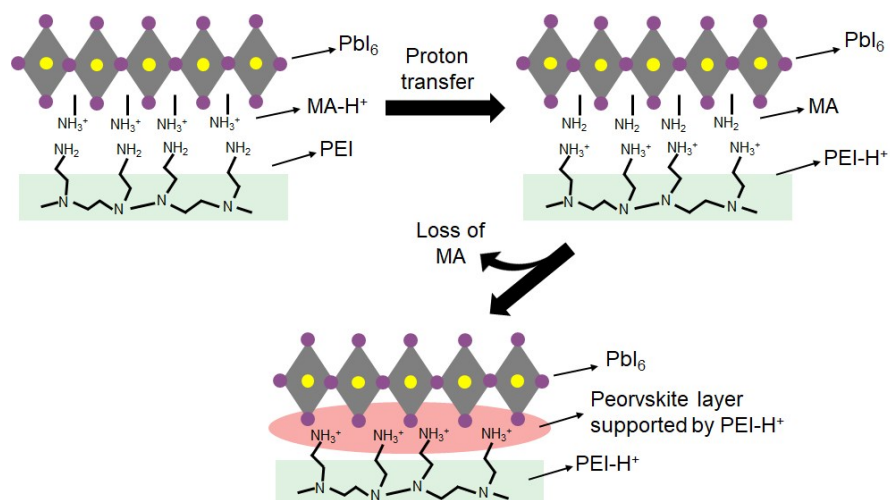

**Fig. S4** Schematic illustration of the PEI-supported perovskite layer formation at the interface of PEI and perovskite.

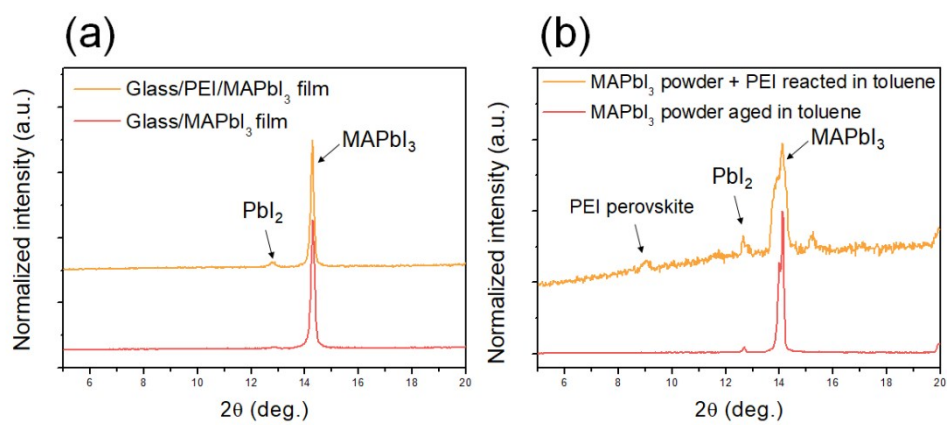

**Fig. S5** XRD patterns of (a) glass/PEI/MAPbI<sub>3</sub> and glass/MAPbI<sub>3</sub> films, (b) MAPbI<sub>3</sub> powder mixed with PEI in toluene and only MAPbI<sub>3</sub> powder immersed in toluene.



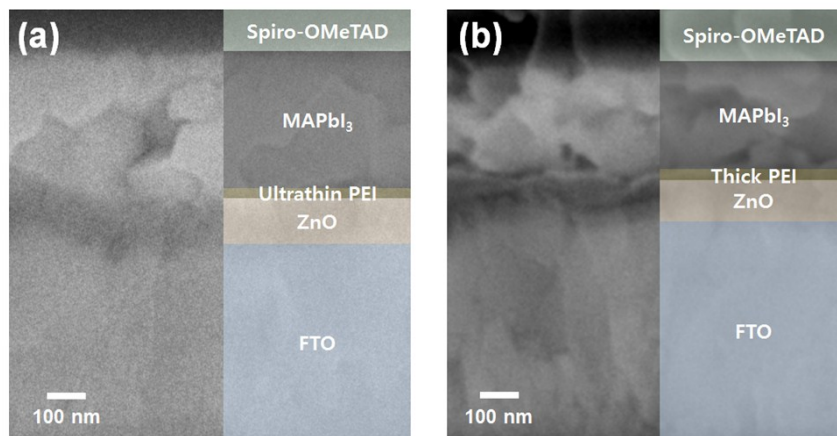

**Fig. S6** Cross-sectional SEM images of FTO-based PSCs with (a) ultrathin PEI layer (coated using 0.1 wt% PEI solution) and (b) thick PEI layer (coated using 1.0 wt% PEI solution).

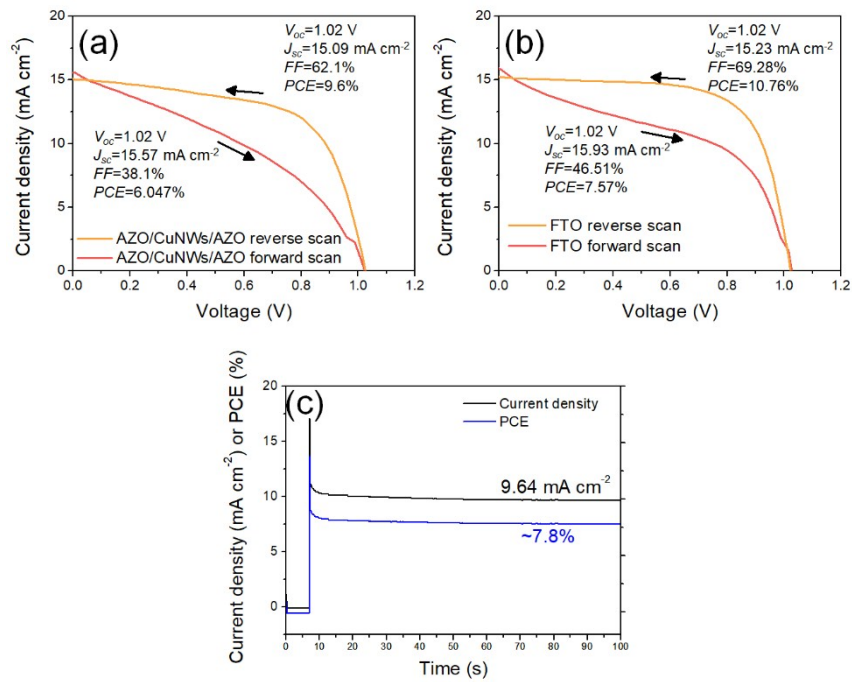

**Fig. S7** Hysteresis behavior of PSCs with (a) AZO/CuNWs/AZO electrode and (b) FTO electrode (dwell time at each data point was 50 ms); (c) stabilized PCE and current density measured at 0.807 V.
